# Supplementary material for: Retrospective analysis of the quality of reports by author-suggested and non-author-suggested reviewers in journals operating on open or single-blind peer review models
Source: HighWire-hosted journal article supplement (doi:10.1136/bmjopen-2015-008707), 2015-09-01
Supplement: bmjopen-2015-008707supp.pdf [file bmjopen-2015-008707supp.pdf]

## Supplementary File 1

### BioMed Central - Author Survey

Thank you for publishing with *BioMed Central*. To help us improve our service to our authors, it would be very helpful if you could spare the time to complete the survey below, indicating how satisfied you were with your experience of publishing with us. We highly value your feedback and will aim to respond quickly to specific suggestions or comments.

**You have already completed a survey for this manuscript. Any further submission will overwrite your previous survey responses. Please only continue if you wish to change your responses.**

**Part A: Please rate your recent experience of publishing in *BioMed Central***

#### Submission

|                                                    | Very Good             | Good                  | Neutral               | Poor                  | Very Poor             | N/A or unknown        |
|----------------------------------------------------|-----------------------|-----------------------|-----------------------|-----------------------|-----------------------|-----------------------|
| Helpfulness/clarity of instructions for authors    | <input type="radio"/> | <input type="radio"/> | <input type="radio"/> | <input type="radio"/> | <input type="radio"/> | <input type="radio"/> |
| Ease of use of online manuscript submission system | <input type="radio"/> | <input type="radio"/> | <input type="radio"/> | <input type="radio"/> | <input type="radio"/> | <input type="radio"/> |
| Speed of online manuscript submission system       | <input type="radio"/> | <input type="radio"/> | <input type="radio"/> | <input type="radio"/> | <input type="radio"/> | <input type="radio"/> |

#### Peer Review

|                                                                 | Very Good             | Good                  | Neutral               | Poor                  | Very Poor             | N/A or unknown        |
|-----------------------------------------------------------------|-----------------------|-----------------------|-----------------------|-----------------------|-----------------------|-----------------------|
| Speed of peer review                                            | <input type="radio"/> | <input type="radio"/> | <input type="radio"/> | <input type="radio"/> | <input type="radio"/> | <input type="radio"/> |
| Helpfulness of comments from peer reviewers                     | <input type="radio"/> | <input type="radio"/> | <input type="radio"/> | <input type="radio"/> | <input type="radio"/> | <input type="radio"/> |
| Usefulness of manuscript tracking information available through | <input type="radio"/> | <input type="radio"/> | <input type="radio"/> | <input type="radio"/> | <input type="radio"/> | <input type="radio"/> |

#### Publication

|                                                                                                 | Very Good             | Good                  | Neutral               | Poor                  | Very Poor             | N/A or unknown        |
|-------------------------------------------------------------------------------------------------|-----------------------|-----------------------|-----------------------|-----------------------|-----------------------|-----------------------|
| Efficiency of pre-acceptance formatting checks process                                          | <input type="radio"/> | <input type="radio"/> | <input type="radio"/> | <input type="radio"/> | <input type="radio"/> | <input type="radio"/> |
| Efficiency of post-acceptance processing (HTML creation and checking, and final PDF generation) | <input type="radio"/> | <input type="radio"/> | <input type="radio"/> | <input type="radio"/> | <input type="radio"/> | <input type="radio"/> |
| Final appearance of article (HTML and PDF versions)                                             | <input type="radio"/> | <input type="radio"/> | <input type="radio"/> | <input type="radio"/> | <input type="radio"/> | <input type="radio"/> |
| Final appearance of figures and tables                                                          | <input type="radio"/> | <input type="radio"/> | <input type="radio"/> | <input type="radio"/> | <input type="radio"/> | <input type="radio"/> |
| Speed with which article is included in PubMed and other abstracting/indexing services          | <input type="radio"/> | <input type="radio"/> | <input type="radio"/> | <input type="radio"/> | <input type="radio"/> | <input type="radio"/> |
| Overall speed of publication                                                                    | <input type="radio"/> | <input type="radio"/> | <input type="radio"/> | <input type="radio"/> | <input type="radio"/> | <input type="radio"/> |

**Customer Service**

|                                                         | Very Good             | Good                  | Neutral               | Poor                  | Very Poor             | N/A or unknown        |
|---------------------------------------------------------|-----------------------|-----------------------|-----------------------|-----------------------|-----------------------|-----------------------|
| Helpfulness of editorial staff                          | <input type="radio"/> | <input type="radio"/> | <input type="radio"/> | <input type="radio"/> | <input type="radio"/> | <input type="radio"/> |
| The speed with which editorial staff respond to queries | <input type="radio"/> | <input type="radio"/> | <input type="radio"/> | <input type="radio"/> | <input type="radio"/> | <input type="radio"/> |

**Overall**

|                               | Very Good             | Good                  | Neutral               | Poor                  | Very Poor             | N/A or unknown        |
|-------------------------------|-----------------------|-----------------------|-----------------------|-----------------------|-----------------------|-----------------------|
| Quality of overall experience | <input type="radio"/> | <input type="radio"/> | <input type="radio"/> | <input type="radio"/> | <input type="radio"/> | <input type="radio"/> |

**Part B: General**

**General**

Would you publish in the journal again?

Would you recommend the journal to a colleague?

On average, how frequently do you read articles from this journal?

**If you have any other comments or suggestions for improvements that we could make, please let us know using the space below:**

A rectangular text input field with a thin border. On the right side, there is a vertical scroll bar with a small handle. At the bottom of the field, there are two small square buttons with left and right-pointing arrows, respectively.
