# Supplementary material for: Retrospective analysis of the quality of reports by author-suggested and non-author-suggested reviewers in journals operating on open or single-blind peer review models
Source: HighWire-hosted journal article supplement (doi:10.1136/bmjopen-2015-008707), 2015-09-01
Supplement: bmjopen-2015-008707supp_table1.pdf [file bmjopen-2015-008707supp_table1.pdf]

**Supplementary Table 1.** Rater agreement on RQI scores is moderate between the raters.

|           | <i>BMC Infectious diseases, BMC Microbiology</i><br>Weighted kappa |           | <i>Journal of Inflammation</i><br>Weighted kappa |
|-----------|--------------------------------------------------------------------|-----------|--------------------------------------------------|
| <b>Q1</b> | 0.39                                                               | <b>Q1</b> | 0.47                                             |
| <b>Q2</b> | 0.39                                                               | <b>Q2</b> | 0.53                                             |
| <b>Q3</b> | 0.36                                                               | <b>Q3</b> | 0.46                                             |
| <b>Q4</b> | 0.44                                                               | <b>Q4</b> | 0.34                                             |
| <b>Q5</b> | 0.49                                                               | <b>Q5</b> | 0.50                                             |
| <b>Q6</b> | 0.42                                                               | <b>Q6</b> | 0.38                                             |
| <b>Q7</b> | 0.39                                                               | <b>Q7</b> | 0.49                                             |
| <b>Q8</b> | 0.09                                                               | <b>Q8</b> | 0.24                                             |

Abbreviations: RQI, Review Quality Instrument; Q1–Q8 – questions from RQI [12]
