# Supplementary material for: Retrospective analysis of the quality of reports by author-suggested and non-author-suggested reviewers in journals operating on open or single-blind peer review models
Source: HighWire-hosted journal article supplement (doi:10.1136/bmjopen-2015-008707), 2015-09-01
Supplement: bmjopen-2015-008707supp_table2.pdf [file bmjopen-2015-008707supp_table2.pdf]

**Supplementary Table 2.** Comparison of RQI scores between open and single blind peer review in the *Journal of Inflammation*.

|                      | Mean score for open peer review | Mean score for single blind peer review | p-value     |
|----------------------|---------------------------------|-----------------------------------------|-------------|
| <b>Q1</b>            | 1.51                            | 1.39                                    | 0.17        |
| <b>Q2</b>            | 2.01                            | 1.99                                    | 0.97        |
| <b>Q3</b>            | 2.53                            | 2.67                                    | 0.12        |
| <b>Q4</b>            | 2.39                            | 2.24                                    | 0.10        |
| <b>Q5</b>            | 3.10                            | 2.98                                    | 0.32        |
| <b>Q6</b>            | 2.89                            | 2.75                                    | 0.12        |
| <b>Q7</b>            | 2.29                            | 2.26                                    | 0.64        |
| <b>Q8</b>            | 3.03                            | 3.00                                    | 0.22        |
| <b>Overall score</b> | <b>2.12</b>                     | <b>2.06</b>                             | <b>0.42</b> |

Abbreviations: ns, RQI, Review Quality Instrument; Q1-Q8 – questions from RQI [12]
