# Supplementary material for: Retrospective analysis of the quality of reports by author-suggested and non-author-suggested reviewers in journals operating on open or single-blind peer review models
Source: HighWire-hosted journal article supplement (doi:10.1136/bmjopen-2015-008707), 2015-09-01
Supplement: bmjopen-2015-008707supp_table3.pdf [file bmjopen-2015-008707supp_table3.pdf]

**Supplementary Table 3.** Comparison of mean RQI scores between author-suggested and non-author-suggested reviewers for *BMC Infectious Diseases*.

|                      | <i>BMC Infectious Diseases</i>            |                                               |             |
|----------------------|-------------------------------------------|-----------------------------------------------|-------------|
|                      | mean score for author-suggested reviewers | mean score for non-author-suggested reviewers | p-value     |
| <b>Q1</b>            | 1.79                                      | 1.87                                          | 0.41        |
| <b>Q2</b>            | 1.79                                      | 1.79                                          | 0.83        |
| <b>Q3</b>            | 2.55                                      | 2.83                                          | 0.06        |
| <b>Q4</b>            | 2.66                                      | 2.83                                          | 0.24        |
| <b>Q5</b>            | 3.30                                      | 3.55                                          | 0.07        |
| <b>Q6</b>            | 3.41                                      | 3.72                                          | 0.03        |
| <b>Q7</b>            | 2.12                                      | 2.44                                          | 0.02        |
| <b>Q8</b>            | 3.52                                      | 3.51                                          | 0.75        |
| <b>Overall score</b> | <b>2.64</b>                               | <b>2.81</b>                                   | <b>0.06</b> |

Abbreviations: RQI, Review Quality Instrument, Q1–Q8 – questions from RQI [12]
