# Supplementary material for: Retrospective analysis of the quality of reports by author-suggested and non-author-suggested reviewers in journals operating on open or single-blind peer review models
Source: HighWire-hosted journal article supplement (doi:10.1136/bmjopen-2015-008707), 2015-09-01
Supplement: bmjopen-2015-008707supp_table4.pdf [file bmjopen-2015-008707supp_table4.pdf]

**Supplementary Table 4.** Comparison of mean RQI scores between author-suggested and non-author-suggested reviewers for *BMC Microbiology*.

|                      | <b><i>BMC Microbiology</i></b>                   |                                                      |                |
|----------------------|--------------------------------------------------|------------------------------------------------------|----------------|
|                      | <b>mean score for author-suggested reviewers</b> | <b>mean score for non-author-suggested reviewers</b> | <b>p-value</b> |
| <b>Q1</b>            | 1.77                                             | 1.68                                                 | 0.37           |
| <b>Q2</b>            | 2.02                                             | 1.90                                                 | 0.33           |
| <b>Q3</b>            | 2.33                                             | 2.44                                                 | 0.53           |
| <b>Q4</b>            | 2.53                                             | 2.58                                                 | 0.86           |
| <b>Q5</b>            | 3.14                                             | 3.20                                                 | 0.63           |
| <b>Q6</b>            | 3.25                                             | 3.30                                                 | 0.70           |
| <b>Q7</b>            | 2.20                                             | 2.40                                                 | 0.24           |
| <b>Q8</b>            | 3.48                                             | 3.44                                                 | 0.52           |
| <b>Overall score</b> | <b>2.59</b>                                      | <b>2.62</b>                                          | <b>0.71</b>    |

Abbreviations: RQI, Review Quality Instrument, Q1–Q8 – questions from RQI [12]
