# Supplementary material for: Retrospective analysis of the quality of reports by author-suggested and non-author-suggested reviewers in journals operating on open or single-blind peer review models
Source: HighWire-hosted journal article supplement (doi:10.1136/bmjopen-2015-008707), 2015-09-01
Supplement: bmjopen-2015-008707supp_table5.pdf [file bmjopen-2015-008707supp_table5.pdf]

**Supplementary Table 5.** Comparison of mean RQI scores between author-suggested and non-author-suggested reviewers for the *Journal of Inflammation*.

|                      | <b>mean score<br/>for author-<br/>suggested<br/>reviewers</b> | <b>mean score<br/>for non-<br/>author-<br/>suggested<br/>reviewers</b> | <b>p-value</b> |
|----------------------|---------------------------------------------------------------|------------------------------------------------------------------------|----------------|
| <b>Q1</b>            | 1.56                                                          | 1.43                                                                   | 0.19           |
| <b>Q2</b>            | 2.12                                                          | 1.97                                                                   | 0.11           |
| <b>Q3</b>            | 2.41                                                          | 2.64                                                                   | 0.04           |
| <b>Q4</b>            | 2.37                                                          | 2.30                                                                   | 0.50           |
| <b>Q5</b>            | 3.06                                                          | 3.03                                                                   | 0.90           |
| <b>Q6</b>            | 2.96                                                          | 2.79                                                                   | 0.20           |
| <b>Q7</b>            | 2.24                                                          | 2.28                                                                   | 0.62           |
| <b>Q8</b>            | 3.05                                                          | 3.00                                                                   | 0.26           |
| <b>Overall score</b> | <b>2.47</b>                                                   | <b>2.43</b>                                                            | <b>0.94</b>    |

Abbreviations: RQI, Review Quality Instrument, Q1–Q8 – questions from RQI [12]
