# Supplementary material for: Retrospective analysis of the quality of reports by author-suggested and non-author-suggested reviewers in journals operating on open or single-blind peer review models
Source: HighWire-hosted journal article supplement (doi:10.1136/bmjopen-2015-008707), 2015-09-01
Supplement: bmjopen-2015-008707supp_table6.pdf [file bmjopen-2015-008707supp_table6.pdf]

**Supplementary Table 6.** Numbers of reviews with each level of author satisfaction score for helpfulness of peer review (1=very poor, 5=very good)

| <b>Score</b>                                                        | <b>1</b> | <b>2</b> | <b>3</b> | <b>4</b> | <b>5</b> | <b>No response</b> | <b>p-value</b> |
|---------------------------------------------------------------------|----------|----------|----------|----------|----------|--------------------|----------------|
| <b><i>BMC Infectious Diseases</i></b><br>(open peer review)         | 4        | 13       | 72       | 323      | 265      | 7                  |                |
| <b><i>BMC Microbiology</i></b><br>(single-blind peer review)        | 8        | 24       | 106      | 376      | 224      | 3                  | 0.00008        |
| <b><i>Journal of Inflammation</i></b><br>(open peer review)         | 0        | 1        | 2        | 25       | 21       | 0                  |                |
| <b><i>Journal of Inflammation</i></b><br>(single-blind peer review) | 0        | 1        | 6        | 18       | 20       | 2                  | 0.73           |
